# Supplementary material for: Genetic association study of common variants in TGFB1 and IL-6 with developmental dysplasia of the hip in Han Chinese population
Source: PubMed Central journal article supplement (PMC5579245; doi:10.1038/s41598-017-11185-1), 2017-08-31
Supplement: 41598_2017_11185_MOESM1_ESM.pdf [file 41598_2017_11185_MOESM1_ESM.pdf]

**Title:** Genetic association study of common variants in *TGFBI* and *IL-6* with developmental dysplasia of the hip in Han Chinese population

**Author names and affiliations:** Wenlong Ma <sup>a\*</sup>, Zhuqing Zha <sup>c\*</sup>, Ke Chen <sup>a</sup>, Honggan Chen <sup>a</sup>, Yixin Wu <sup>a</sup>, Jianbing Ma <sup>b</sup>, Sixiang Zeng <sup>d</sup>, Liqiang Zhi <sup>b</sup> and Shuxin Yao <sup>b</sup>

<sup>a</sup> Department of Hip Injury and Disease, Orthopedic Hospital of Henan Province, Qiming South Road No.82, Luoyang, Henan, China;

<sup>b</sup> Department of Joint Surgery, Honghui Hospital, Xi'an Jiaotong University Health Science Center, Xi'an, Shaanxi, China;

<sup>c</sup> The Third Clinical Medical College of Guangzhou University of Traditional Chinese Medicine, Guangzhou, Guangdong, China;

<sup>d</sup> Department of Orthopedics, the First Affiliated Hospital, Xi'an Jiaotong University, Xi'an, Shaanxi, China.

\* These authors contributed equally to this work.

**Corresponding Author:**

Liqiang Zhi, M.D., Department of Joint Surgery, Honghui Hospital, Xi'an Jiaotong University Health Science Center, No.555, Youyi East Road, Xi'an, Shaanxi, China, 710054.

Tel: 86-29-88418011; Fax: 86-29-62818386; E-mail: zhiliqiang2011@126.com

Shuxin Yao, M.D. & Ph.D., Department of Joint Surgery, Honghui Hospital, Xi'an Jiaotong University Health Science Center, No.555, Youyi East Road, Xi'an, Shaanxi, China, 710054.

Tel: 86-29-88418009; Fax: 86-29-62818386; E-mail: popgold@163.com

## **Supplemental methods**

### ***Power Analyses***

We conducted comprehensive power analyses for the single marker-based association study using Genetic Power Calculator (<http://pngu.mgh.harvard.edu/~purcell/gpc/>). For parameter setting, we chose 0.1% as the prevalence of DDH, and we hypothesized that the allele frequency of our risk allele was 0.21, which is the average MAF of the 32 selected markers in the discovery stage. The results of the power analyses showed that for an underlying marker with a relative risk of 1.25, our study design could achieve a statistical power of 0.7996 when the MAFs of the risk marker and tested marker were matched. Thus, our study design was efficient to detect markers with a relative risk greater than or equal to 1.25.

Supplemental Table S1. MAF and Hardy-Weingberg Equilibrium Test results of the 32 selected SNPs.

| CHR | SNP         | Position | Alleles | Func           | Loci         | MAF  | HWE  |
|-----|-------------|----------|---------|----------------|--------------|------|------|
| 7   | rs1800796   | 22726627 | C/G     | near-gene-5    | <i>IL6</i>   | 0.25 | 0.65 |
| 7   | rs2069837   | 22728408 | A/G     | intron         | <i>IL6</i>   | 0.19 | 0.92 |
| 7   | rs2066992   | 22728630 | G/T     | intron         | <i>IL6</i>   | 0.29 | 1.00 |
| 7   | rs2069840   | 22728953 | C/G     | intron         | <i>IL6</i>   | 0.09 | 1.00 |
| 7   | rs55998531  | 22729053 | A/G     | intron         | <i>IL6</i>   | 0.07 | 0.35 |
| 7   | rs13306433  | 22729295 | A/G     | intron         | <i>IL6</i>   | 0.05 | 0.18 |
| 7   | rs2069847   | 22730989 | A/G     | intron         | <i>IL6</i>   | 0.08 | 1.00 |
| 7   | rs13306436  | 22731677 | A/G     | untranslated-3 | <i>IL6</i>   | 0.08 | 0.56 |
| 19  | rs1056854   | 41304090 | A/G     | coding-synon   | <i>TGFBI</i> | 0.23 | 0.93 |
| 19  | rs76567264  | 41319004 | G/T     | intron         | <i>TGFBI</i> | 0.08 | 1.00 |
| 19  | rs77665081  | 41320947 | A/G     | intron         | <i>TGFBI</i> | 0.07 | 0.62 |
| 19  | rs147152044 | 41321198 | A/G     | intron         | <i>TGFBI</i> | 0.09 | 1.00 |
| 19  | rs7257742   | 41321447 | G/T     | intron         | <i>TGFBI</i> | 0.36 | 1.00 |
| 19  | rs2241719   | 41323676 | A/T     | untranslated-3 | <i>TGFBI</i> | 0.28 | 0.94 |
| 19  | rs117068651 | 41326647 | A/T     | unknown        | <i>TGFBI</i> | 0.07 | 0.48 |
| 19  | rs10417924  | 41327262 | C/T     | unknown        | <i>TGFBI</i> | 0.15 | 0.82 |
| 19  | rs191638973 | 41327833 | C/T     | unknown        | <i>TGFBI</i> | 0.06 | 0.61 |
| 19  | rs190566789 | 41332269 | C/T     | coding-synon   | <i>TGFBI</i> | 0.05 | 0.32 |
| 19  | rs8105161   | 41333726 | C/T     | intron         | <i>TGFBI</i> | 0.35 | 0.90 |
| 19  | rs11466347  | 41335193 | A/G     | intron         | <i>TGFBI</i> | 0.27 | 0.82 |
| 19  | rs11466345  | 41337556 | A/G     | intron         | <i>TGFBI</i> | 0.28 | 0.83 |
| 19  | rs6508975   | 41338654 | C/T     | intron         | <i>TGFBI</i> | 0.32 | 0.89 |
| 19  | rs11466344  | 41339408 | A/G     | intron         | <i>TGFBI</i> | 0.06 | 0.79 |
| 19  | rs2278422   | 41339853 | C/G     | intron         | <i>TGFBI</i> | 0.06 | 0.43 |

---

|    |             |          |       |                         |              |      |      |
|----|-------------|----------|-------|-------------------------|--------------|------|------|
| 19 | rs10416269  | 41342943 | A/G   | intron                  | <i>TGFB1</i> | 0.43 | 0.95 |
| 19 | rs144114219 | 41345370 | A/G   | intron                  | <i>TGFB1</i> | 0.07 | 0.38 |
| 19 | rs7249191   | 41345410 | C/T   | intron                  | <i>TGFB1</i> | 0.36 | 0.70 |
| 19 | rs116975930 | 41345578 | A/C   | intron                  | <i>TGFB1</i> | 0.05 | 0.32 |
| 19 | rs6508976   | 41348769 | A/G/T | intron                  | <i>TGFB1</i> | 0.44 | 0.86 |
| 19 | rs1800470   | 41353016 | C/T   | missense                | <i>TGFB1</i> | 0.46 | 0.95 |
| 19 | rs1800469   | 41354391 | C/T   | near-gene-3,near-gene-5 | <i>TGFB1</i> | 0.48 | 0.95 |
| 19 | rs4803457   | 41355454 | C/T   | intron,near-gene-5      | <i>TGFB1</i> | 0.48 | 0.86 |

---

Supplemental Table S2. Full results of single marker based association analysis using three coding models in discovery stage.

| CHR | SNP         | BP       | A1 | Additive Model |       |          | Dominant Model |       |          | Recessive Model |       |          |
|-----|-------------|----------|----|----------------|-------|----------|----------------|-------|----------|-----------------|-------|----------|
|     |             |          |    | OR             | STAT  | <i>P</i> | OR             | STAT  | <i>P</i> | OR              | STAT  | <i>P</i> |
| 7   | rs1800796   | 22726627 | G  | 0.79           | -2.03 | 0.0427   | 0.78           | -1.70 | 0.0894   | 0.59            | -1.66 | 0.0979   |
| 7   | rs2069837   | 22728408 | G  | 1.08           | 0.58  | 0.5652   | 1.11           | 0.67  | 0.5038   | 1.00            | 0.00  | 0.9996   |
| 7   | rs2066992   | 22728630 | G  | 1.07           | 0.62  | 0.5334   | 1.06           | 0.42  | 0.6777   | 1.21            | 0.70  | 0.4862   |
| 7   | rs2069840   | 22728953 | G  | 0.97           | -0.16 | 0.8741   | 0.94           | -0.31 | 0.7573   | 1.45            | 0.54  | 0.5894   |
| 7   | rs55998531  | 22729053 | G  | 0.78           | -1.24 | 0.2150   | 0.76           | -1.31 | 0.1892   | 0.96            | -0.04 | 0.9644   |
| 7   | rs13306433  | 22729295 | A  | 0.72           | -1.41 | 0.1592   | 0.68           | -1.53 | 0.1263   | 0.97            | -0.04 | 0.9718   |
| 7   | rs2069847   | 22730989 | A  | 0.98           | -0.08 | 0.9333   | 1.02           | 0.09  | 0.9290   | 0.62            | -0.65 | 0.5156   |
| 7   | rs13306436  | 22731677 | A  | 1.02           | 0.12  | 0.9014   | 1.05           | 0.26  | 0.7959   | 0.57            | -0.58 | 0.5607   |
| 19  | rs1056854   | 41304090 | G  | 0.90           | -0.84 | 0.3993   | 0.93           | -0.53 | 0.5938   | 0.72            | -1.05 | 0.2942   |
| 19  | rs76567264  | 41319004 | T  | 1.05           | 0.25  | 0.7995   | 1.05           | 0.23  | 0.8154   | 1.15            | 0.16  | 0.8690   |
| 19  | rs77665081  | 41320947 | A  | 0.90           | -0.50 | 0.6188   | 0.90           | -0.48 | 0.6292   | 0.82            | -0.22 | 0.8285   |
| 19  | rs147152044 | 41321198 | G  | 0.90           | -0.61 | 0.5390   | 0.86           | -0.79 | 0.4306   | 1.61            | 0.60  | 0.5466   |
| 19  | rs7257742   | 41321447 | T  | 0.91           | -0.86 | 0.3923   | 0.88           | -0.85 | 0.3959   | 0.90            | -0.48 | 0.6284   |
| 19  | rs2241719   | 41323676 | A  | 0.92           | -0.73 | 0.4680   | 0.90           | -0.71 | 0.4777   | 0.90            | -0.40 | 0.6920   |
| 19  | rs117068651 | 41326647 | T  | 1.21           | 0.98  | 0.3293   | 1.17           | 0.74  | 0.4581   | 4.16            | 1.37  | 0.1709   |
| 19  | rs10417924  | 41327262 | T  | 0.98           | -0.16 | 0.8713   | 1.01           | 0.03  | 0.9767   | 0.78            | -0.58 | 0.5600   |
| 19  | rs191638973 | 41327833 | T  | 0.84           | -0.83 | 0.4041   | 0.84           | -0.81 | 0.4186   | 0.71            | -0.38 | 0.7041   |
| 19  | rs190566789 | 41332269 | T  | 0.86           | -0.68 | 0.4953   | 0.86           | -0.62 | 0.5348   | 0.63            | -0.47 | 0.6355   |

---

|    |             |          |   |      |       |        |      |       |        |      |       |        |
|----|-------------|----------|---|------|-------|--------|------|-------|--------|------|-------|--------|
| 19 | rs8105161   | 41333726 | C | 0.94 | -0.56 | 0.5745 | 0.92 | -0.55 | 0.5845 | 0.93 | -0.33 | 0.7423 |
| 19 | rs11466347  | 41335193 | T | 0.96 | -0.35 | 0.7249 | 0.93 | -0.51 | 0.6068 | 1.04 | 0.13  | 0.8949 |
| 19 | rs11466345  | 41337556 | C | 0.96 | -0.33 | 0.7447 | 0.94 | -0.45 | 0.6539 | 1.02 | 0.07  | 0.9439 |
| 19 | rs6508975   | 41338654 | C | 1.03 | 0.28  | 0.7782 | 0.99 | -0.07 | 0.9403 | 1.19 | 0.73  | 0.4641 |
| 19 | rs11466344  | 41339408 | T | 1.13 | 0.60  | 0.5492 | 1.15 | 0.65  | 0.5188 | 0.98 | -0.02 | 0.9868 |
| 19 | rs2278422   | 41339853 | C | 1.05 | 0.24  | 0.8123 | 1.06 | 0.27  | 0.7890 | 0.98 | -0.03 | 0.9769 |
| 19 | rs10416269  | 41342943 | G | 1.04 | 0.39  | 0.6937 | 1.04 | 0.23  | 0.8191 | 1.09 | 0.43  | 0.6647 |
| 19 | rs144114219 | 41345370 | A | 0.98 | -0.12 | 0.9006 | 0.99 | -0.03 | 0.9783 | 0.69 | -0.42 | 0.6725 |
| 19 | rs7249191   | 41345410 | C | 1.00 | 0.04  | 0.9667 | 0.98 | -0.15 | 0.8785 | 1.07 | 0.31  | 0.7599 |
| 19 | rs116975930 | 41345578 | A | 0.97 | -0.13 | 0.8974 | 0.94 | -0.24 | 0.8072 | 1.80 | 0.51  | 0.6115 |
| 19 | rs6508976   | 41348769 | G | 1.03 | 0.31  | 0.7539 | 1.01 | 0.08  | 0.9340 | 1.09 | 0.45  | 0.6498 |
| 19 | rs1800470   | 41353016 | G | 1.37 | 3.05  | 0.0023 | 1.46 | 2.28  | 0.0224 | 1.58 | 2.69  | 0.0071 |
| 19 | rs1800469   | 41354391 | A | 0.97 | -0.34 | 0.7337 | 1.00 | 0.03  | 0.9784 | 0.90 | -0.60 | 0.5517 |
| 19 | rs4803457   | 41355454 | T | 0.95 | -0.53 | 0.5932 | 0.92 | -0.49 | 0.6264 | 0.94 | -0.38 | 0.7024 |

---

Supplemental Table S3. Results of the haplotype analyses.

| LOCUS | HAPLOTYPE | F_A   | F_U   | CHISQ   | DF | P                                        | SNPS                       |
|-------|-----------|-------|-------|---------|----|------------------------------------------|----------------------------|
| H1    | OMNIBUS   | -     | -     | 1.463   | 2  | 0.4812                                   |                            |
| H1    | TA        | 0.268 | 0.284 | 0.696   | 1  | 0.4042                                   | rs7257742 rs2241719        |
| H1    | TT        | 0.088 | 0.077 | 1.028   | 1  | 0.3107                                   |                            |
| H1    | GT        | 0.644 | 0.640 | 0.043   | 1  | 0.8348                                   |                            |
| H2    | OMNIBUS   | -     | -     | 1.767   | 2  | 0.4133                                   |                            |
| H2    | TC        | 0.263 | 0.265 | 0.008   | 1  | 0.9286                                   | rs11466347 rs11466345      |
| H2    | CC        | 0.029 | 0.020 | 1.766   | 1  | 0.1839                                   |                            |
| H2    | CT        | 0.708 | 0.715 | 0.120   | 1  | 0.7286                                   |                            |
| H3    | OMNIBUS   | -     | -     | 118.700 | 2  | <b><math>1.65 \times 10^{-26}</math></b> |                            |
| H3    | GG        | 0.443 | 0.437 | 0.090   | 1  | 0.7643                                   | <b>rs6508976 rs1800470</b> |
| H3    | TG        | 0.081 | 0.008 | 115.200 | 1  | $7.12 \times 10^{-27}$                   |                            |
| H3    | TA        | 0.476 | 0.555 | 14.060  | 1  | 0.0002                                   |                            |
| H4    | OMNIBUS   | -     | -     | 1.611   | 2  | 0.4468                                   |                            |
| H4    | AT        | 0.469 | 0.472 | 0.022   | 1  | 0.8832                                   | rs1800469 rs4803457        |
| H4    | GT        | 0.015 | 0.009 | 1.611   | 1  | 0.2044                                   |                            |
| H4    | GC        | 0.516 | 0.519 | 0.014   | 1  | 0.9074                                   |                            |

Significant results were highlighted in bold.

Supplemental Table S4. Results of the association analyses between genotyped markers in combined samples and the severity of DDH.

| CHR | SNP       | BP       | Effect Allele | Other Allele | OR   | 95%CI        | STAT  | <i>P</i> |
|-----|-----------|----------|---------------|--------------|------|--------------|-------|----------|
| 7   | rs1800796 | 22726627 | G             | C            | 0.85 | [0.68, 1.07] | -1.36 | 0.1755   |
| 7   | rs2069837 | 22728408 | G             | T            | 0.88 | [0.69, 1.13] | -1.00 | 0.3175   |
| 19  | rs6508976 | 41348769 | G             | T            | 0.90 | [0.74, 1.09] | -1.06 | 0.2881   |
| 19  | rs1800470 | 41353016 | G             | A            | 0.99 | [0.81, 1.20] | -0.12 | 0.9021   |



Supplemental Table S5. Summarized results of gene by gene interaction analyses.

| SNP1       | CHR1 | GENE1      | SNP2        | CHR2 | GENE2        | inter.OR | inter.Z | inter.P |
|------------|------|------------|-------------|------|--------------|----------|---------|---------|
| rs13306436 | 7    | <i>IL6</i> | rs11466345  | 19   | <i>TGFB1</i> | 2.16     | 2.46    | 0.0137  |
| rs13306433 | 7    | <i>IL6</i> | rs11466347  | 19   | <i>TGFB1</i> | 2.47     | 2.22    | 0.0265  |
| rs13306433 | 7    | <i>IL6</i> | rs11466345  | 19   | <i>TGFB1</i> | 2.41     | 2.17    | 0.0302  |
| rs13306436 | 7    | <i>IL6</i> | rs11466347  | 19   | <i>TGFB1</i> | 1.89     | 2.07    | 0.0386  |
| rs13306436 | 7    | <i>IL6</i> | rs6508975   | 19   | <i>TGFB1</i> | 1.86     | 2.04    | 0.0413  |
| rs2066992  | 7    | <i>IL6</i> | rs116975930 | 19   | <i>TGFB1</i> | 0.42     | -1.98   | 0.0472  |
| rs2069847  | 7    | <i>IL6</i> | rs2241719   | 19   | <i>TGFB1</i> | 0.55     | -1.92   | 0.0543  |
| rs13306436 | 7    | <i>IL6</i> | rs6508976   | 19   | <i>TGFB1</i> | 1.60     | 1.74    | 0.0810  |
| rs2069847  | 7    | <i>IL6</i> | rs11466347  | 19   | <i>TGFB1</i> | 1.66     | 1.66    | 0.0973  |
| rs2069847  | 7    | <i>IL6</i> | rs6508975   | 19   | <i>TGFB1</i> | 1.58     | 1.64    | 0.1011  |
| rs2069840  | 7    | <i>IL6</i> | rs10417924  | 19   | <i>TGFB1</i> | 0.58     | -1.55   | 0.1211  |
| rs13306436 | 7    | <i>IL6</i> | rs1800470   | 19   | <i>TGFB1</i> | 1.52     | 1.54    | 0.1244  |
| rs13306436 | 7    | <i>IL6</i> | rs117068651 | 19   | <i>TGFB1</i> | 2.10     | 1.53    | 0.1258  |
| rs2069847  | 7    | <i>IL6</i> | rs116975930 | 19   | <i>TGFB1</i> | 0.32     | -1.51   | 0.1299  |
| rs13306433 | 7    | <i>IL6</i> | rs6508975   | 19   | <i>TGFB1</i> | 1.78     | 1.51    | 0.1301  |
| rs13306436 | 7    | <i>IL6</i> | rs144114219 | 19   | <i>TGFB1</i> | 0.34     | -1.51   | 0.1308  |
| rs2069840  | 7    | <i>IL6</i> | rs1056854   | 19   | <i>TGFB1</i> | 1.53     | 1.51    | 0.1314  |
| rs55998531 | 7    | <i>IL6</i> | rs11466344  | 19   | <i>TGFB1</i> | 2.30     | 1.49    | 0.1372  |
| rs2069847  | 7    | <i>IL6</i> | rs8105161   | 19   | <i>TGFB1</i> | 1.54     | 1.48    | 0.1393  |
| rs13306433 | 7    | <i>IL6</i> | rs8105161   | 19   | <i>TGFB1</i> | 1.68     | 1.48    | 0.1401  |
| rs13306433 | 7    | <i>IL6</i> | rs2278422   | 19   | <i>TGFB1</i> | 0.34     | -1.46   | 0.1445  |
| rs13306436 | 7    | <i>IL6</i> | rs8105161   | 19   | <i>TGFB1</i> | 1.52     | 1.46    | 0.1449  |
| rs1800796  | 7    | <i>IL6</i> | rs76567264  | 19   | <i>TGFB1</i> | 1.60     | 1.45    | 0.1481  |
| rs2069847  | 7    | <i>IL6</i> | rs11466344  | 19   | <i>TGFB1</i> | 2.07     | 1.43    | 0.1521  |
| rs2069847  | 7    | <i>IL6</i> | rs11466345  | 19   | <i>TGFB1</i> | 1.52     | 1.40    | 0.1625  |
| rs13306436 | 7    | <i>IL6</i> | rs11466344  | 19   | <i>TGFB1</i> | 2.11     | 1.37    | 0.1707  |
| rs2069847  | 7    | <i>IL6</i> | rs10417924  | 19   | <i>TGFB1</i> | 1.53     | 1.35    | 0.1761  |
| rs2069837  | 7    | <i>IL6</i> | rs116975930 | 19   | <i>TGFB1</i> | 0.54     | -1.35   | 0.1782  |
| rs13306436 | 7    | <i>IL6</i> | rs1800469   | 19   | <i>TGFB1</i> | 1.40     | 1.34    | 0.1806  |
| rs2069840  | 7    | <i>IL6</i> | rs144114219 | 19   | <i>TGFB1</i> | 1.86     | 1.33    | 0.1844  |
| rs2069840  | 7    | <i>IL6</i> | rs6508976   | 19   | <i>TGFB1</i> | 1.38     | 1.32    | 0.1884  |
| rs55998531 | 7    | <i>IL6</i> | rs147152044 | 19   | <i>TGFB1</i> | 0.47     | -1.31   | 0.1892  |
| rs55998531 | 7    | <i>IL6</i> | rs2241719   | 19   | <i>TGFB1</i> | 0.65     | -1.31   | 0.1893  |
| rs55998531 | 7    | <i>IL6</i> | rs144114219 | 19   | <i>TGFB1</i> | 2.07     | 1.31    | 0.1900  |
| rs55998531 | 7    | <i>IL6</i> | rs10417924  | 19   | <i>TGFB1</i> | 1.59     | 1.30    | 0.1942  |
| rs1800796  | 7    | <i>IL6</i> | rs116975930 | 19   | <i>TGFB1</i> | 0.58     | -1.29   | 0.1956  |
| rs2069837  | 7    | <i>IL6</i> | rs7257742   | 19   | <i>TGFB1</i> | 1.28     | 1.27    | 0.2026  |
| rs2069840  | 7    | <i>IL6</i> | rs1800470   | 19   | <i>TGFB1</i> | 1.38     | 1.27    | 0.2048  |
| rs13306436 | 7    | <i>IL6</i> | rs116975930 | 19   | <i>TGFB1</i> | 0.38     | -1.24   | 0.2136  |
| rs55998531 | 7    | <i>IL6</i> | rs6508975   | 19   | <i>TGFB1</i> | 1.43     | 1.22    | 0.2222  |

|            |   |     |             |    |       |      |       |        |
|------------|---|-----|-------------|----|-------|------|-------|--------|
| rs55998531 | 7 | IL6 | rs11466345  | 19 | TGFB1 | 1.44 | 1.22  | 0.2233 |
| rs13306436 | 7 | IL6 | rs4803457   | 19 | TGFB1 | 1.36 | 1.21  | 0.2266 |
| rs55998531 | 7 | IL6 | rs7249191   | 19 | TGFB1 | 1.44 | 1.21  | 0.2269 |
| rs55998531 | 7 | IL6 | rs116975930 | 19 | TGFB1 | 0.34 | -1.21 | 0.2272 |
| rs13306433 | 7 | IL6 | rs116975930 | 19 | TGFB1 | 0.24 | -1.20 | 0.2309 |
| rs2066992  | 7 | IL6 | rs11466347  | 19 | TGFB1 | 1.24 | 1.18  | 0.2375 |
| rs2069847  | 7 | IL6 | rs191638973 | 19 | TGFB1 | 0.53 | -1.16 | 0.2453 |
| rs1800796  | 7 | IL6 | rs117068651 | 19 | TGFB1 | 1.47 | 1.15  | 0.2494 |
| rs55998531 | 7 | IL6 | rs11466347  | 19 | TGFB1 | 1.40 | 1.15  | 0.2515 |
| rs1800796  | 7 | IL6 | rs11466344  | 19 | TGFB1 | 1.46 | 1.12  | 0.2606 |
| rs55998531 | 7 | IL6 | rs4803457   | 19 | TGFB1 | 1.37 | 1.12  | 0.2617 |
| rs13306436 | 7 | IL6 | rs77665081  | 19 | TGFB1 | 1.63 | 1.11  | 0.2666 |
| rs13306436 | 7 | IL6 | rs10417924  | 19 | TGFB1 | 0.69 | -1.09 | 0.2754 |
| rs1800796  | 7 | IL6 | rs190566789 | 19 | TGFB1 | 1.48 | 1.00  | 0.3161 |
| rs2069837  | 7 | IL6 | rs4803457   | 19 | TGFB1 | 0.83 | -1.00 | 0.3180 |
| rs2069837  | 7 | IL6 | rs11466344  | 19 | TGFB1 | 1.40 | 0.98  | 0.3296 |
| rs55998531 | 7 | IL6 | rs1800469   | 19 | TGFB1 | 1.32 | 0.97  | 0.3299 |
| rs2069847  | 7 | IL6 | rs1800469   | 19 | TGFB1 | 0.79 | -0.96 | 0.3389 |
| rs2066992  | 7 | IL6 | rs191638973 | 19 | TGFB1 | 1.38 | 0.94  | 0.3472 |
| rs1800796  | 7 | IL6 | rs1800470   | 19 | TGFB1 | 0.85 | -0.94 | 0.3476 |
| rs1800796  | 7 | IL6 | rs77665081  | 19 | TGFB1 | 1.39 | 0.92  | 0.3572 |
| rs2069840  | 7 | IL6 | rs116975930 | 19 | TGFB1 | 0.57 | -0.91 | 0.3630 |
| rs2069837  | 7 | IL6 | rs191638973 | 19 | TGFB1 | 1.43 | 0.89  | 0.3752 |
| rs2069837  | 7 | IL6 | rs2241719   | 19 | TGFB1 | 1.20 | 0.88  | 0.3791 |
| rs13306436 | 7 | IL6 | rs2278422   | 19 | TGFB1 | 0.63 | -0.86 | 0.3895 |
| rs2069840  | 7 | IL6 | rs7249191   | 19 | TGFB1 | 1.24 | 0.86  | 0.3918 |
| rs2069837  | 7 | IL6 | rs8105161   | 19 | TGFB1 | 0.85 | -0.85 | 0.3945 |
| rs2069847  | 7 | IL6 | rs7257742   | 19 | TGFB1 | 0.80 | -0.83 | 0.4077 |
| rs2069837  | 7 | IL6 | rs11466345  | 19 | TGFB1 | 0.85 | -0.83 | 0.4079 |
| rs2069837  | 7 | IL6 | rs1800470   | 19 | TGFB1 | 0.85 | -0.83 | 0.4080 |
| rs2069847  | 7 | IL6 | rs147152044 | 19 | TGFB1 | 0.67 | -0.83 | 0.4084 |
| rs1800796  | 7 | IL6 | rs2278422   | 19 | TGFB1 | 0.77 | -0.82 | 0.4118 |
| rs2069840  | 7 | IL6 | rs7257742   | 19 | TGFB1 | 1.21 | 0.80  | 0.4212 |
| rs2069847  | 7 | IL6 | rs76567264  | 19 | TGFB1 | 0.71 | -0.80 | 0.4226 |
| rs2069847  | 7 | IL6 | rs117068651 | 19 | TGFB1 | 1.43 | 0.79  | 0.4267 |
| rs55998531 | 7 | IL6 | rs117068651 | 19 | TGFB1 | 0.66 | -0.78 | 0.4327 |
| rs1800796  | 7 | IL6 | rs1056854   | 19 | TGFB1 | 1.16 | 0.78  | 0.4383 |
| rs2069847  | 7 | IL6 | rs4803457   | 19 | TGFB1 | 0.83 | -0.77 | 0.4438 |
| rs2069847  | 7 | IL6 | rs77665081  | 19 | TGFB1 | 0.67 | -0.76 | 0.4451 |
| rs55998531 | 7 | IL6 | rs77665081  | 19 | TGFB1 | 0.61 | -0.76 | 0.4501 |
| rs13306433 | 7 | IL6 | rs10416269  | 19 | TGFB1 | 0.79 | -0.73 | 0.4675 |
| rs2066992  | 7 | IL6 | rs2241719   | 19 | TGFB1 | 1.14 | 0.72  | 0.4705 |
| rs2069837  | 7 | IL6 | rs1800469   | 19 | TGFB1 | 0.88 | -0.72 | 0.4718 |
| rs2069847  | 7 | IL6 | rs10416269  | 19 | TGFB1 | 1.19 | 0.67  | 0.5026 |

|            |   |     |             |    |       |      |       |        |
|------------|---|-----|-------------|----|-------|------|-------|--------|
| rs1800796  | 7 | IL6 | rs7249191   | 19 | TGFBI | 0.89 | -0.67 | 0.5029 |
| rs1800796  | 7 | IL6 | rs191638973 | 19 | TGFBI | 1.27 | 0.66  | 0.5118 |
| rs13306433 | 7 | IL6 | rs144114219 | 19 | TGFBI | 0.67 | -0.65 | 0.5130 |
| rs2066992  | 7 | IL6 | rs6508976   | 19 | TGFBI | 1.12 | 0.65  | 0.5160 |
| rs2069837  | 7 | IL6 | rs117068651 | 19 | TGFBI | 1.26 | 0.64  | 0.5253 |
| rs13306436 | 7 | IL6 | rs2241719   | 19 | TGFBI | 0.83 | -0.61 | 0.5420 |
| rs2066992  | 7 | IL6 | rs11466345  | 19 | TGFBI | 1.12 | 0.61  | 0.5432 |
| rs2069837  | 7 | IL6 | rs6508975   | 19 | TGFBI | 0.89 | -0.61 | 0.5447 |
| rs13306436 | 7 | IL6 | rs147152044 | 19 | TGFBI | 1.30 | 0.60  | 0.5492 |
| rs1800796  | 7 | IL6 | rs6508975   | 19 | TGFBI | 1.11 | 0.59  | 0.5584 |
| rs13306433 | 7 | IL6 | rs2241719   | 19 | TGFBI | 0.80 | -0.58 | 0.5588 |
| rs2069847  | 7 | IL6 | rs7249191   | 19 | TGFBI | 1.16 | 0.58  | 0.5594 |
| rs13306433 | 7 | IL6 | rs1800470   | 19 | TGFBI | 0.82 | -0.56 | 0.5724 |
| rs2069837  | 7 | IL6 | rs77665081  | 19 | TGFBI | 0.79 | -0.56 | 0.5751 |
| rs2069840  | 7 | IL6 | rs11466347  | 19 | TGFBI | 0.85 | -0.56 | 0.5760 |
| rs2069840  | 7 | IL6 | rs191638973 | 19 | TGFBI | 0.75 | -0.55 | 0.5812 |
| rs55998531 | 7 | IL6 | rs76567264  | 19 | TGFBI | 0.73 | -0.55 | 0.5824 |
| rs13306433 | 7 | IL6 | rs4803457   | 19 | TGFBI | 0.85 | -0.54 | 0.5893 |
| rs2066992  | 7 | IL6 | rs8105161   | 19 | TGFBI | 0.91 | -0.54 | 0.5898 |
| rs55998531 | 7 | IL6 | rs6508976   | 19 | TGFBI | 1.18 | 0.53  | 0.5959 |
| rs1800796  | 7 | IL6 | rs7257742   | 19 | TGFBI | 1.10 | 0.51  | 0.6071 |
| rs13306433 | 7 | IL6 | rs76567264  | 19 | TGFBI | 1.44 | 0.51  | 0.6076 |
| rs1800796  | 7 | IL6 | rs11466347  | 19 | TGFBI | 1.10 | 0.50  | 0.6185 |
| rs2069837  | 7 | IL6 | rs1056854   | 19 | TGFBI | 0.89 | -0.49 | 0.6225 |
| rs13306433 | 7 | IL6 | rs190566789 | 19 | TGFBI | 0.71 | -0.49 | 0.6242 |
| rs2069837  | 7 | IL6 | rs2278422   | 19 | TGFBI | 0.83 | -0.49 | 0.6252 |
| rs13306433 | 7 | IL6 | rs147152044 | 19 | TGFBI | 1.35 | 0.47  | 0.6356 |
| rs13306433 | 7 | IL6 | rs117068651 | 19 | TGFBI | 0.74 | -0.47 | 0.6382 |
| rs2066992  | 7 | IL6 | rs117068651 | 19 | TGFBI | 0.86 | -0.46 | 0.6426 |
| rs55998531 | 7 | IL6 | rs1056854   | 19 | TGFBI | 1.17 | 0.46  | 0.6460 |
| rs55998531 | 7 | IL6 | rs2278422   | 19 | TGFBI | 1.33 | 0.46  | 0.6485 |
| rs13306433 | 7 | IL6 | rs77665081  | 19 | TGFBI | 0.66 | -0.45 | 0.6500 |
| rs1800796  | 7 | IL6 | rs144114219 | 19 | TGFBI | 0.86 | -0.45 | 0.6524 |
| rs13306433 | 7 | IL6 | rs1800469   | 19 | TGFBI | 0.88 | -0.44 | 0.6567 |
| rs2069847  | 7 | IL6 | rs2278422   | 19 | TGFBI | 0.77 | -0.44 | 0.6569 |
| rs2069840  | 7 | IL6 | rs147152044 | 19 | TGFBI | 1.19 | 0.44  | 0.6606 |
| rs13306433 | 7 | IL6 | rs1056854   | 19 | TGFBI | 1.20 | 0.44  | 0.6618 |
| rs2069840  | 7 | IL6 | rs190566789 | 19 | TGFBI | 1.27 | 0.43  | 0.6636 |
| rs1800796  | 7 | IL6 | rs10416269  | 19 | TGFBI | 0.93 | -0.43 | 0.6639 |
| rs2066992  | 7 | IL6 | rs7257742   | 19 | TGFBI | 1.07 | 0.43  | 0.6643 |
| rs2066992  | 7 | IL6 | rs77665081  | 19 | TGFBI | 0.88 | -0.42 | 0.6757 |
| rs2069840  | 7 | IL6 | rs10416269  | 19 | TGFBI | 1.11 | 0.42  | 0.6771 |
| rs13306436 | 7 | IL6 | rs76567264  | 19 | TGFBI | 1.23 | 0.40  | 0.6917 |
| rs2066992  | 7 | IL6 | rs11466344  | 19 | TGFBI | 1.13 | 0.40  | 0.6921 |

|            |   |     |             |    |       |      |       |        |
|------------|---|-----|-------------|----|-------|------|-------|--------|
| rs2069840  | 7 | IL6 | rs8105161   | 19 | TGFBI | 1.10 | 0.38  | 0.7028 |
| rs2069837  | 7 | IL6 | rs144114219 | 19 | TGFBI | 1.14 | 0.38  | 0.7043 |
| rs13306433 | 7 | IL6 | rs7249191   | 19 | TGFBI | 0.87 | -0.37 | 0.7129 |
| rs2069847  | 7 | IL6 | rs144114219 | 19 | TGFBI | 0.85 | -0.36 | 0.7214 |
| rs1800796  | 7 | IL6 | rs1800469   | 19 | TGFBI | 1.06 | 0.33  | 0.7388 |
| rs2066992  | 7 | IL6 | rs10416269  | 19 | TGFBI | 1.05 | 0.32  | 0.7487 |
| rs2069837  | 7 | IL6 | rs10417924  | 19 | TGFBI | 1.09 | 0.32  | 0.7522 |
| rs13306433 | 7 | IL6 | rs7257742   | 19 | TGFBI | 1.10 | 0.30  | 0.7646 |
| rs2066992  | 7 | IL6 | rs7249191   | 19 | TGFBI | 1.05 | 0.30  | 0.7650 |
| rs2069847  | 7 | IL6 | rs1056854   | 19 | TGFBI | 1.09 | 0.29  | 0.7702 |
| rs13306436 | 7 | IL6 | rs7257742   | 19 | TGFBI | 1.09 | 0.29  | 0.7706 |
| rs1800796  | 7 | IL6 | rs147152044 | 19 | TGFBI | 1.10 | 0.29  | 0.7748 |
| rs2069837  | 7 | IL6 | rs76567264  | 19 | TGFBI | 0.90 | -0.28 | 0.7760 |
| rs55998531 | 7 | IL6 | rs10416269  | 19 | TGFBI | 1.08 | 0.26  | 0.7943 |
| rs2066992  | 7 | IL6 | rs6508975   | 19 | TGFBI | 0.96 | -0.26 | 0.7963 |
| rs2069840  | 7 | IL6 | rs2278422   | 19 | TGFBI | 0.88 | -0.25 | 0.8037 |
| rs1800796  | 7 | IL6 | rs8105161   | 19 | TGFBI | 0.96 | -0.23 | 0.8146 |
| rs13306436 | 7 | IL6 | rs190566789 | 19 | TGFBI | 0.86 | -0.23 | 0.8210 |
| rs1800796  | 7 | IL6 | rs10417924  | 19 | TGFBI | 0.95 | -0.23 | 0.8210 |
| rs1800796  | 7 | IL6 | rs4803457   | 19 | TGFBI | 1.04 | 0.22  | 0.8230 |
| rs55998531 | 7 | IL6 | rs1800470   | 19 | TGFBI | 1.07 | 0.22  | 0.8248 |
| rs55998531 | 7 | IL6 | rs8105161   | 19 | TGFBI | 1.07 | 0.22  | 0.8257 |
| rs13306436 | 7 | IL6 | rs191638973 | 19 | TGFBI | 0.91 | -0.22 | 0.8262 |
| rs2066992  | 7 | IL6 | rs2278422   | 19 | TGFBI | 0.93 | -0.22 | 0.8265 |
| rs2069847  | 7 | IL6 | rs1800470   | 19 | TGFBI | 0.94 | -0.22 | 0.8270 |
| rs2066992  | 7 | IL6 | rs76567264  | 19 | TGFBI | 1.07 | 0.20  | 0.8381 |
| rs2066992  | 7 | IL6 | rs190566789 | 19 | TGFBI | 1.08 | 0.19  | 0.8458 |
| rs55998531 | 7 | IL6 | rs190566789 | 19 | TGFBI | 1.12 | 0.19  | 0.8514 |
| rs2069837  | 7 | IL6 | rs190566789 | 19 | TGFBI | 1.08 | 0.18  | 0.8537 |
| rs13306436 | 7 | IL6 | rs10416269  | 19 | TGFBI | 1.05 | 0.18  | 0.8541 |
| rs2066992  | 7 | IL6 | rs4803457   | 19 | TGFBI | 0.97 | -0.18 | 0.8600 |
| rs2069840  | 7 | IL6 | rs1800469   | 19 | TGFBI | 0.96 | -0.18 | 0.8606 |
| rs13306433 | 7 | IL6 | rs11466344  | 19 | TGFBI | 1.12 | 0.17  | 0.8689 |
| rs55998531 | 7 | IL6 | rs7257742   | 19 | TGFBI | 0.96 | -0.15 | 0.8795 |
| rs1800796  | 7 | IL6 | rs2241719   | 19 | TGFBI | 1.03 | 0.13  | 0.8936 |
| rs13306436 | 7 | IL6 | rs7249191   | 19 | TGFBI | 1.04 | 0.13  | 0.8947 |
| rs13306436 | 7 | IL6 | rs1056854   | 19 | TGFBI | 1.04 | 0.13  | 0.8970 |
| rs2069837  | 7 | IL6 | rs7249191   | 19 | TGFBI | 1.02 | 0.12  | 0.9040 |
| rs2069837  | 7 | IL6 | rs10416269  | 19 | TGFBI | 0.98 | -0.12 | 0.9060 |
| rs2066992  | 7 | IL6 | rs144114219 | 19 | TGFBI | 0.97 | -0.12 | 0.9082 |
| rs2069840  | 7 | IL6 | rs11466345  | 19 | TGFBI | 0.97 | -0.12 | 0.9082 |
| rs2069837  | 7 | IL6 | rs11466347  | 19 | TGFBI | 0.98 | -0.11 | 0.9087 |
| rs2069840  | 7 | IL6 | rs76567264  | 19 | TGFBI | 1.06 | 0.11  | 0.9088 |
| rs2066992  | 7 | IL6 | rs147152044 | 19 | TGFBI | 1.03 | 0.11  | 0.9093 |

|            |   |            |             |    |              |      |       |        |
|------------|---|------------|-------------|----|--------------|------|-------|--------|
| rs2066992  | 7 | <i>IL6</i> | rs1800469   | 19 | <i>TGFB1</i> | 0.98 | -0.10 | 0.9166 |
| rs13306433 | 7 | <i>IL6</i> | rs191638973 | 19 | <i>TGFB1</i> | 1.06 | 0.10  | 0.9166 |
| rs2069837  | 7 | <i>IL6</i> | rs6508976   | 19 | <i>TGFB1</i> | 1.02 | 0.10  | 0.9176 |
| rs2069840  | 7 | <i>IL6</i> | rs117068651 | 19 | <i>TGFB1</i> | 1.04 | 0.10  | 0.9221 |
| rs1800796  | 7 | <i>IL6</i> | rs6508976   | 19 | <i>TGFB1</i> | 0.98 | -0.10 | 0.9227 |
| rs2069840  | 7 | <i>IL6</i> | rs4803457   | 19 | <i>TGFB1</i> | 0.98 | -0.09 | 0.9250 |
| rs1800796  | 7 | <i>IL6</i> | rs11466345  | 19 | <i>TGFB1</i> | 1.02 | 0.09  | 0.9286 |
| rs13306433 | 7 | <i>IL6</i> | rs10417924  | 19 | <i>TGFB1</i> | 0.97 | -0.08 | 0.9324 |
| rs2069840  | 7 | <i>IL6</i> | rs77665081  | 19 | <i>TGFB1</i> | 0.96 | -0.08 | 0.9334 |
| rs2069837  | 7 | <i>IL6</i> | rs147152044 | 19 | <i>TGFB1</i> | 1.03 | 0.08  | 0.9400 |
| rs2069840  | 7 | <i>IL6</i> | rs6508975   | 19 | <i>TGFB1</i> | 1.02 | 0.06  | 0.9490 |
| rs2066992  | 7 | <i>IL6</i> | rs1056854   | 19 | <i>TGFB1</i> | 1.01 | 0.06  | 0.9508 |
| rs2066992  | 7 | <i>IL6</i> | rs10417924  | 19 | <i>TGFB1</i> | 1.01 | 0.06  | 0.9530 |
| rs2069847  | 7 | <i>IL6</i> | rs190566789 | 19 | <i>TGFB1</i> | 0.97 | -0.05 | 0.9626 |
| rs13306433 | 7 | <i>IL6</i> | rs6508976   | 19 | <i>TGFB1</i> | 0.99 | -0.04 | 0.9683 |
| rs2069847  | 7 | <i>IL6</i> | rs6508976   | 19 | <i>TGFB1</i> | 0.99 | -0.03 | 0.9759 |
| rs2069840  | 7 | <i>IL6</i> | rs2241719   | 19 | <i>TGFB1</i> | 1.00 | -0.02 | 0.9852 |
| rs2069840  | 7 | <i>IL6</i> | rs11466344  | 19 | <i>TGFB1</i> | 0.99 | -0.02 | 0.9876 |
| rs2066992  | 7 | <i>IL6</i> | rs1800470   | 19 | <i>TGFB1</i> | 1.00 | -0.02 | 0.9877 |
| rs55998531 | 7 | <i>IL6</i> | rs191638973 | 19 | <i>TGFB1</i> | 1.01 | 0.01  | 0.9921 |

*P* value threshold used for this analysis was 0.05/192≈0.00026.

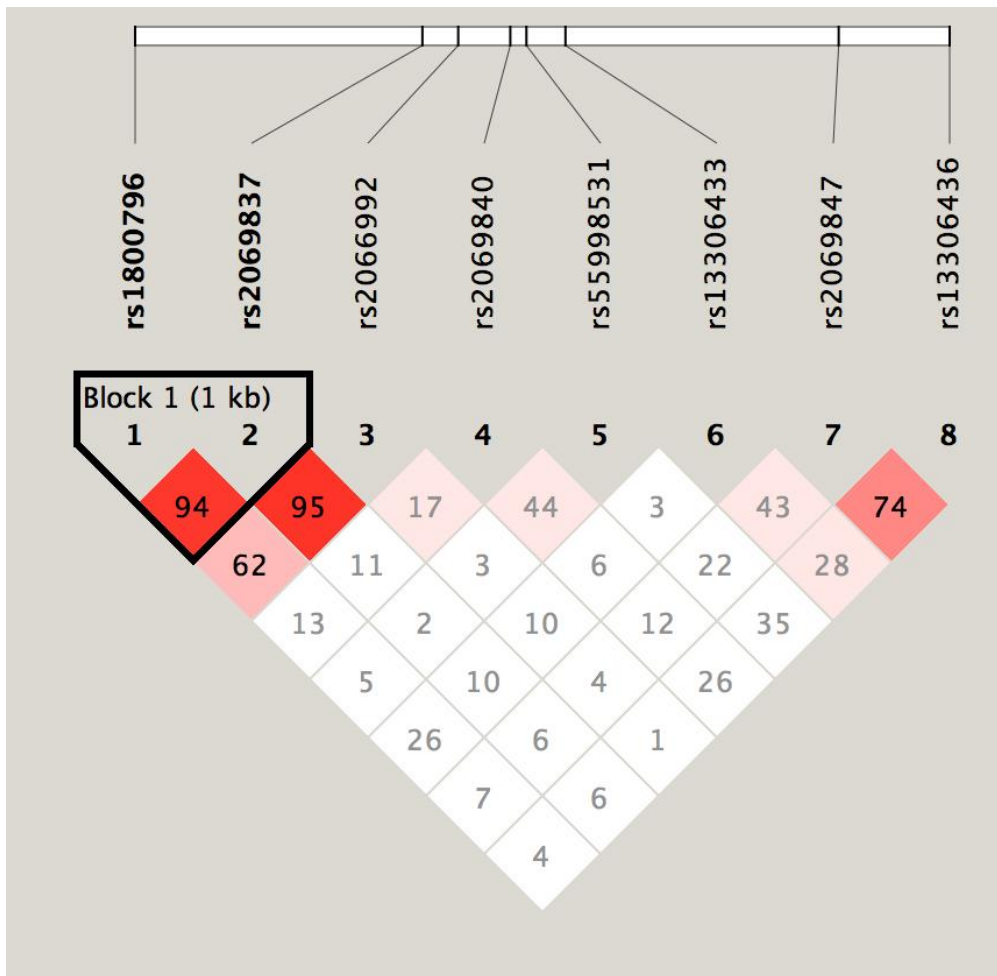

Supplemental Figure S1. LD structure of gene *IL-6* using the genotype data of discovery stage.

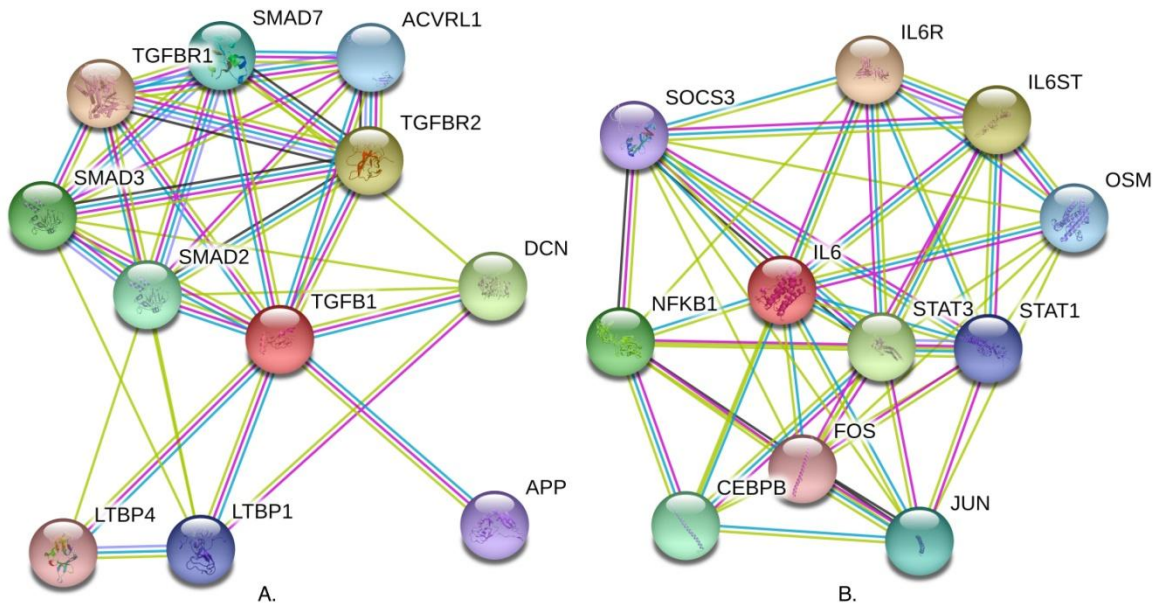

Supplemental Figure S2. Sub-network structure of gene *TGFBI*(A) and *IL-6*(B).
